# Supplementary material for: Contribution of Individual Polyphenols to Antioxidant Activity of Cotoneaster bullatus and Cotoneaster zabelii Leaves—Structural Relationships, Synergy Effects and Application for Quality Control
Source: PubMed Central journal article supplement (PMC7023040; doi:10.3390/antiox9010069), 2020-01-12
Supplement: antioxidants-09-00069-s001.pdf [file antioxidants-09-00069-s001.pdf]

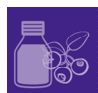

## Supplementary Materials:

# Contribution of Individual Polyphenols to Antioxidant Activity of *Cotoneaster bullatus* and *Cotoneaster zabelii* Leaves - Structural Relationships, Synergy Effects and Application for Quality Control

Agnieszka Kicel, Aleksandra Owczarek, Paulina Kapusta, Joanna Kolodziejczyk-Czepas, and Monika A. Olszewska

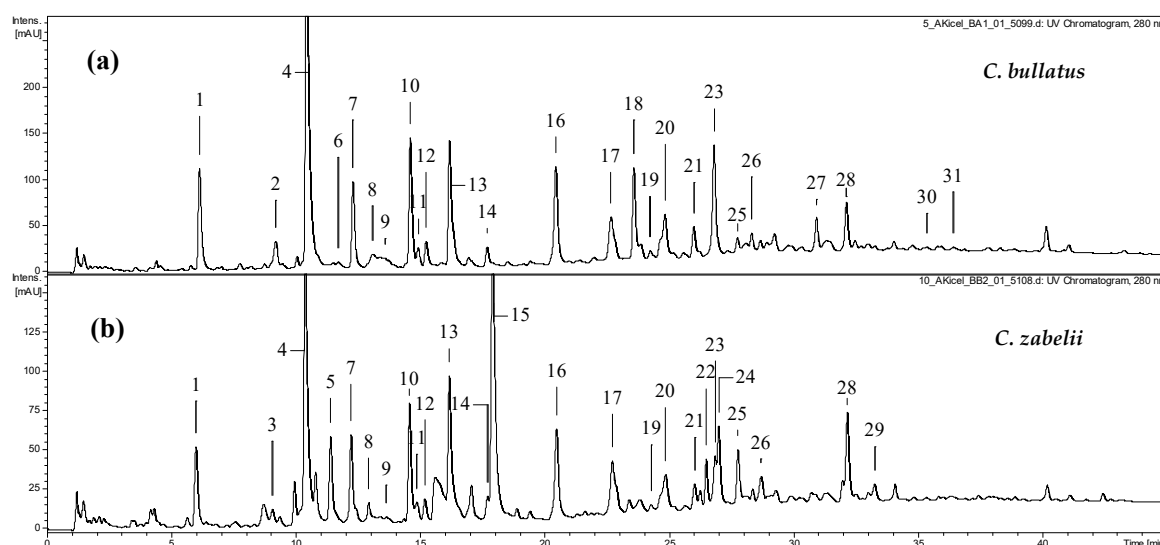

**Figure S1.** Representative UHPLC-UV chromatograms of the methanol-water (7;3, *v/v*) extracts from the leaves of *C. bullatus* (a) and *C. zabelii* (b) at 280 nm. The peak numbers refer to those applied in Table S1.

**Table S1.** UHPLC-PDA-ESI-MS<sup>3</sup> data of polyphenols identified in the methanol-water (7:3, v/v) extracts from the leaves of *C. bullatus* and *C. zabelii*.

| Peak | Analyte                                                                                     | R <sub>t</sub> <sup>a</sup><br>(min) | UV<br>λ <sub>max</sub> <sup>b</sup><br>(nm) | [M-H] <sup>-c</sup><br>(m/z) | MS <sup>2</sup>               | MS <sup>3</sup> | ME<br>Extracts <sup>d</sup> |
|------|---------------------------------------------------------------------------------------------|--------------------------------------|---------------------------------------------|------------------------------|-------------------------------|-----------------|-----------------------------|
| 1    | neochlorogenic acid<br>(3- <i>O</i> -caffeoylquinic acid, <b>NCHA</b> )*                    | 6.1                                  | 325                                         | 353                          | 191, 179, 135                 |                 | CB, CZ                      |
| 2    | procyanidin dimer B-type                                                                    | 9.0                                  | 280                                         | 577                          | 451, <b>425</b> , 407, 289    | 407, 273        | CB                          |
| 3    | caffeic acid derivative                                                                     | 9.7                                  | 325                                         | 451                          | 405, 179                      |                 | CZ                          |
| 4    | chlorogenic acid<br>(5- <i>O</i> -caffeoylquinic acid, <b>CHA</b> )*                        | 10.4                                 | 325                                         | 353                          | 191, 179                      |                 | CB, CZ                      |
| 5    | dicafeoylquinic acid isomer                                                                 | 11.1                                 | 325                                         | 515                          | 395, 379, 285                 |                 | CZ                          |
| 6    | procyanidin dimer B-type                                                                    | 11.7                                 | 280                                         | 577                          | 451, <b>425</b> , 407, 289    | 407, 273        | CB                          |
| 7    | cryptochlorogenic acid<br>4- <i>O</i> -caffeoylquinic acid, <b>CCHA</b> )*                  | 12.3                                 | 325                                         | 353                          | 191, 179, 173                 |                 | CB, CZ                      |
| 8    | dicafeoylquinic acid isomer                                                                 | 12.8                                 | 325                                         | 515                          | 395, 379, 285                 |                 | CB, CZ                      |
| 9    | procyanidin dimer B-type                                                                    | 13.5                                 | 280                                         | 577                          | 451, <b>425</b> , 407, 289    | 407, 273        | CB, CZ                      |
| 10   | procyanidin B2 ( <b>PB2</b> )*                                                              | 14.6                                 | 280                                         | 577                          | 451, <b>425</b> , 407, 289    | 407, 273        | CB, CZ                      |
| 11   | procyanidin trimer B-type                                                                   | 15.0                                 | 280                                         | 865                          | 739, <b>713</b> , 695, 577    | 695, 425, 407   | CB, CZ                      |
| 12   | 5- <i>p</i> -coumaroylquinic acid                                                           | 15.3                                 | 310                                         | 337                          | 191, 163                      |                 | CB, CZ                      |
| 13   | (-)-epicatechin ( <b>ECA</b> )*                                                             | 16.1                                 | 280                                         | 289                          | 245, 205, 179, 137            |                 | CB, CZ                      |
| 14   | procyanidin tetramer B-type                                                                 | 17.7                                 | 280                                         | 1153                         | 1027, 863, 739, 501, 491, 289 |                 | CB, CZ                      |
| 15   | caffeic acid derivative ( <b>CAD</b> )                                                      | 18.2                                 | 290, 328                                    | 613                          | 457, 339, 295, 179            |                 | CZ                          |
| 16   | procyanidin C1 ( <b>PC1</b> )*                                                              | 20.4                                 | 280                                         | 865                          | <b>713</b> , 695, 577         | 695, 425, 407   | CB, CZ                      |
| 17   | procyanidin tetramer B-type                                                                 | 22.9                                 | 280                                         | 1153                         | 1027, 863, 739, 501, 491, 289 |                 | CB, CZ                      |
| 18   | quercetin pentoside-hexoside ( <b>QPH</b> )                                                 | 23.6                                 | 268, 355                                    | 595                          | 463, 445, 301                 |                 | CB                          |
| 19   | procyanidin tetramer B-type                                                                 | 24.3                                 | 280                                         | 1153                         | 1027, 863, 739, 501, 491, 289 |                 | CB, CZ                      |
| 20   | procyanidin dimer hexoside                                                                  | 24.9                                 | 280                                         | 739                          | 587, 577, 451, 289            |                 | CB, CZ                      |
| 21   | quercetin rhamnoside-hexoside                                                               | 26.4                                 | 255, 355                                    | 609                          | <b>447</b> , 343, 301         | 301             | CB, CZ                      |
| 22   | quercetin dirhamnoside                                                                      | 26.6                                 | 255, 350                                    | 593                          | <b>447</b> , 301              | 301             | CZ                          |
| 23   | hyperoside<br>(quercetin 3- <i>O</i> -β-galactoside, <b>HP</b> )*                           | 26.9                                 | 255, 353                                    | 463                          | 301                           |                 | CB, CZ                      |
| 24   | rutin (quercetin<br>3- <i>O</i> -β-(6''- <i>O</i> -α-rhamnosyl)-glucoside<br>, <b>RT</b> )* | 27.3                                 | 265, 350                                    | 609                          | 463, 343, 301                 |                 | CZ                          |
| 25   | isoquercitrin<br>(quercetin- <i>O</i> -β-glucoside, <b>IQ</b> )*                            | 27.9                                 | 275, 350                                    | 463                          | 301                           |                 | CB, CZ                      |
| 26   | procyanidin dimer B-type                                                                    | 28.5                                 | 280                                         | 577                          | 425, 407, 289                 |                 | CB, CZ                      |
| 27   | quercetin rhamnoside-hexoside                                                               | 31.0                                 | 265, 355                                    | 609                          | 447, 301                      |                 | CB                          |
| 28   | quercitrin<br>(quercetin 3- <i>O</i> -β-rhamnoside, <b>QR</b> )*                            | 32.2                                 | 275, 350                                    | 447                          | 301                           |                 | CB, CZ                      |
| 29   | quercetin hexoside derivative                                                               | 33.3                                 | 265, 355                                    | 505                          | 463, 337, 301                 |                 | CZ                          |
| 30   | quercetin dirhamnoside                                                                      | 35.3                                 | 365, 355                                    | 593                          | 447, 301                      |                 | CB                          |
| 31   | dicafeoylquinic acid isomer                                                                 | 36.3                                 | 325                                         | 515                          | 379, <b>353</b> , 299, 203    | 191, 179, 173   | CB                          |

\* identified with authentic standards; <sup>a</sup> R<sub>t</sub> retention time; <sup>b</sup> UV λ<sub>max</sub>, absorbance maxima in PDA spectra; <sup>c</sup> [M-H]<sup>-</sup>, pseudomolecular ion in MS spectra recorded in a negative mode; <sup>d</sup> ME extracts, methanol-water (7:3, v/v) leaf extracts; **CB**, *C. bullatus*; **CZ**, *C. zabelii*.

**Table S2.** Chromatographic properties of the optimized HPLC-PDA method.

| Analyte     | $t_R$ (min) | RSD $t_R$ (%) | $R_s$  | $T$   | $w$   | $F$   |
|-------------|-------------|---------------|--------|-------|-------|-------|
| <b>NCHA</b> | 3.58        | 2.28          | -      | 1.021 | 2.616 | 1.281 |
| <b>CHA</b>  | 6.19        | 0.88          | 16.337 | 1.038 | 1.558 | 0.750 |
| <b>CCHA</b> | 6.82        | 0.58          | 5.242  | 1.052 | 1.460 | 0.694 |
| <b>PB2</b>  | 7.33        | 0.99          | 5.125  | 1.036 | 1.409 | 0.680 |
| <b>ECA</b>  | 7.91        | 0.48          | 5.785  | 1.143 | 1.215 | 0.532 |
| <b>PC1</b>  | 8.71        | 1.04          | 7.601  | 1.061 | 1.361 | 0.641 |
| <b>CAD</b>  | 9.12        | 1.54          | 3.102  | 1.121 | 1.260 | 0.562 |
| <b>QPH</b>  | 9.54        | 1.12          | 6.914  | 1.308 | 1.260 | 0.482 |
| <b>RT</b>   | 10.23       | 0.53          | 8.787  | 1.087 | 1.111 | 0.511 |
| <b>HP</b>   | 10.49       | 0.66          | 1.703  | 1.112 | 1.158 | 0.520 |
| <b>IQ</b>   | 10.85       | 0.70          | 2.022  | 1.109 | 1.142 | 0.515 |
| <b>QR</b>   | 11.83       | 0.82          | 12.006 | 1.119 | 1.215 | 0.543 |

$t_R$ , retention time; RSD  $t_R$  values for retention times ( $t_R$ ); resolution ( $R_s$ ) and symmetry ( $T$ ) factors between analyte peaks were calculated using the following equations:  $R_s = 2.0 \times (t_{R2} - t_{R1}) / (w_2 + w_1)$  and  $T = w / 2F$ , where  $(t_{R2} - t_{R1})$  is the difference between retention times of two peaks;  $(w_2 + w_1)$  is the sum of peak widths at baseline between tangent lines drawn at 50% of peak heights;  $w$  is the peak width at 5% of peak height; and  $F$  is the time from width start point at 5% of peak height to  $t_R$ .
